# Supplementary material
Source: PubMed Central journal article supplement (PMC7217416)
Supplement: ASN.2019111168SupplementaryData.pdf [file ASN.2019111168SupplementaryData.pdf]

## **Participating Countries and Collaborating Investigators**

**Argentina:** Rodolfo Andres Ahuad Guerrero, Diego Aizenberg, Juan Pablo Albisu, Andres Alvarisqueta, Ines Bartolacci, Mario Alberto Berli, Anselmo Bordonava, Pedro Calella, Maria Cecilia Cantero, Luis Rodolfo Cartasegna, Esteban Cercos, Gabriela Cecilia Coloma, Hugo Colombo, Victor Commendatore, Jesus Cuadrado, Carlos Alberto Cuneo, Ana Maria Cusumano, Walter Guillermo Douthat, Ricardo Dario Dran, Eduardo Farias, Maria Florencia Fernandez, Hernan Finkelstein, Guillermo Fragale, Jose Osvaldo Fretes, Nestor Horacio Garcia, Anibal Gastaldi, Elizabeth Gellersztein, Jorge Archibaldo Glenney, Joaquin Pablo Gonzalez, Patricia del Carmen Gonzalez Colaso, Claudia Goycoa, Gustavo Cristian Greloni, Adrian Guinsburg, Sonia Hermida, Luis Isaias Juncos, Maria Isabel Klyver, Florencia Kraft, Fernando Krynski, Paulina Virginia Lanchiotti, Ricardo Alfonso Leon de la Fuente, Nora Marchetta, Pablo Mele, Silvia Nicolai, Pablo Antonio Novoa, Silvia Ines Orio, Fabian Otreras, Alejandra Oviedo, Pablo Raffaele, Jorge Hector Resk, Lucas Rista, Nelson Rodriguez Papini, Jorgelina Sala, Juan Carlos Santos, Lilia Beatriz Schiavi, Horacio Sessa, Tomas Smith Casabella, Maria Rosa Ulla, Augusto Vallejos, Adriana Villarino, Virginia Esther Visco, Alfredo Wassermann, Cesar Javier Zaidman; **Australia:** Ngai Wah Cheung, Carolyn Droste, Ian Fraser, David Johnson, Peak Mann Mah, Kathy Nicholls, David Packham, Joseph Proietto, Anthony Roberts, Simon Roger, Venessa Tsang; **Brazil:** Roberto Abrão Raduan, Fernando Augusto Alves da Costa, Celso Amodeo, Luiz Alberto Andreotti Turatti, Rachel Bregman, Fernanda Cristina Camelo Sanches, Luis Henrique Canani, Antônio Roberto Chacra, João Lindolfo Cunha Borges, Sérgio Alberto Cunha Vêncio, Roberto Jorge da Silva Franco, Domingos d'Avila, Evandro de Souza Portes, Pedro de Souza, Luciane Mônica Deboni, Fadlo Fraige Filho, Bruno Geloneze Neto, Marcus Gomes, Suely Keiko Kohara, Elizete Keitel, Jose Francisco Kerr Saraiva, Hugo Roberto Kurtz Lisboa, Fabiana Loss de Carvalho Contieri, Rosângela Milagres, Renan Montenegro Junior, Claudia Moreira de Brito, Miguel Nasser Hissa, Ângela Regina Nazario Sabbag, Irene Noronha, Daniel Panarotto, Roberto Pecoits Filho, Márcio Antônio Pereira, Wladmir Saporito, Antonio Scafuto Scotton, Tiago Schuch, Roberto Simões de Almeida, Cássio Slompo Ramos, João Soares Felício, Fernando

Thomé, Jean Carlo Tibes Hachmann, Sérgio Yamada, Cesar Yoiti Hayashida, Tarissa Beatrice Zanata Petry, Maria Teresa Zanella; **Bulgaria:** Viktoria Andreeva, Angelina Angelova, Stefan Dimitrov, Veselka Genadieva, Gabriela Genova-Hristova, Kiril Hristozov, Zdravko Kamenov, Atanas Koundurdjiev, Lachezar Lozanov, Viktor Margaritov, Boyan Nonchev, Rangel Rangelov, Alexander Shinkov, Margarita Temelkova, Ekaterina Velichkova, Andrian Yakov; **Canada:** Naresh Aggarwal, Ronnie Aronson, Harpreet Bajaj, David Cherney, Guy Chouinard, James Conway, Serge Cournoyer, Gerald DaRoza, Sacha De Serres, François Dubé, Ronald Goldenberg, Anil Gupta, Milan Gupta, Sam Henein, Hasnain Khandwala, Lawrence Leiter, Adeera Levin, François Madore, Alan McMahan, Norman Muirhead, Vincent Pichette, Remi Rabasa-Lhoret, Andrew Steele, Navdeep Tangri, Ali Torshizi, Vincent Woo, Nadia Zalunardo; **Chile:** María Alicia Fernández Montenegro, Juan Gonzalo Godoy Jorquera, Marcelo Medina Fariña, Victor Saavedra Gajardo, Margarita Vejar; **China:** Nan Chen, Qinkai Chen, Shenglian Gan, Yaozhong Kong, Detian Li, Wenge Li, Xuemei Li, Hongli Lin, Jian Liu, Weiping Lu, Hong Mao, Yan Ren, Weihong Song, Jiao Sun, Lin Sun, Ping Tu, Guixia Wang, Jinkui Yang, Aiping Yin, Xueqing Yu, Minghui Zhao, Hongguang Zheng; **Colombia:** Jose Luis Accini Mendoza, Edgar Arcos, Jorge Avendano, Jorge Ernesto Andres Diaz Ruiz, Luis Hernando Garcia Ortiz, Alexander Gonzalez, Eric Hernandez Triana, Juan Diego Higuera, Natalia Malaver, Dora Inés Molina de Salazar, Ricardo Rosero, Monica Alexandra Terront Lozano, Luis Valderrama Cometa, Alex Valenzuela, Ruben Dario Vargas Alonso, Ivan Villegas, Hernan Yupanqui; **Czech Republic:** Dagmar Bartaskova, Petr Barton, Jana Belobradkova, Lenka Dohnalova, Tomas Drasnar, Richard Ferkl, Katarina Halciakova, Vera Klokocnikova, Richard Kovar, Jiri Lastuvka, Martin Lukac, Satu Pesickova, Karel Peterka, Jiri Pumprla, Ivan Rychlik, Frantisek Saudek, Vladimir Tesar, Martin Valis, Pavel Weiner, Stanislav Zemek; **France:** Eric Alamartine, Sophie Borot, Bertrand Cariou, Bertrand Dussol, Jean-Pierre Fauvel, Pierre Gourdy, Alexandre Klein, Yannick Le Meur, Alfred Penfornis, Ronan Roussel, Pierre-Jean Saulnier, Eric Thervet, Philippe Zaoui; **Germany:** Volker Burst, Markus Faghih, Grit Faulmann, Hermann Haller, Reinhold Jerwan-Keim, Stephan Maxeiner, Björn Paschen, Georg Plassmann, Ludger Rose; **Guatemala:** Ronaldo Arturo Gonzalez Orellana,

Franklin Paul Haase, Juan Pablo Moreira Diaz, Luis Alberto Ramirez Roca, Jose Antonio Sánchez Arenales, José Vicente Sanchez Polo, Erick Turcios Juarez; **Hungary:** Gyongyi Csecsei, Botond Csiky, Peter Danos, Laszlo Deak, Mihaly Dudas, Eleonora Harcsa, Katalin Keltai, Sandor Keresztesi, Krisztian Kiss, Laszlo Konyves, Lajos Major, Margit Mileder, Marta Molnar, Janos Mucsi, Tamas Oroszlan, Ivan Ory, Gyorgy Paragh, Eva Peterfai, Gizella Petro, Katalin Revesz, Robert Takacs, Sandor Vangel, Szilard Vasas, Marianna Zsom; **India:** Oomman Abraham, Raju Sree Bhushan, Dewan Deepak, Fernando M. Edwin, Natarajan Gopalakrishnan, Noble Gracious, Alva Hansraj, Dinesh Jain, C. B. Keshavamurthy, Dinesh Khullar, Sahay Manisha, Jayameena Peringat, Narayan Prasad, Rao K. Satyanarayana, Reddy Sreedhar, Melemadathil Sreelatha, Bhimavarapu Sudhakar, Ramesh Chandra Vyasam; **Italy:** Riccardo Bonadonna, Pietro Castellino, Antonio Ceriello, Luca Chiovato, Salvatore De Cosmo, Luca De Nicola, Giuseppe Derosa, Alberto Di Carlo, Graziano Di Cianni, Giovanni Frascà, Giorgio Fuiano, Giovanni Gambaro, Giacomo Garibotto, Carlo Giorda, Fabio Malberti, Marcora Mandreoli, Edoardo Mannucci, Emanuela Orsi, Piermarco Piatti, Domenico Santoro, Ferdinando Carlo Sasso, Gaetano Serviddio, Andrea Stella, Roberto Trevisan, Anna Maria Veronelli; **Japan:** Hitoshi Akiyama, Hiromi Aoki, Akimichi Asano, Tadashi Iitsuka, Shizuo Kajiyama, Susumu Kashine, Toshio Kawada, Takamoto Koderu, Hiroshi Kono, Kazunori Koyama, Yasuro Kumeda, Shozo Miyauchi, Kazuyuki Mizuyama, Tetsuji Niiya, Hiroko Oishi, Satoshi Ota, Terue Sakakibara, Masahiko Takai, Osamu Tomonaga, Mitsuru Tsujimoto, Takashi Wada, Masakiyo Wakasugi, Yasushi Wakida, Takayuki Watanabe, Masayo Yamada, Kazuhiro Yanagida, Toshihiko Yanase, Wataru Yumita; **Lithuania:** Egle Gaupsiene, Dalia Kozloviene, Antanas Navickas, Egle Urbanaviciene; **Malaysia:** Rohana Abdul Ghani, Khalid Abdul Kadir, Norsiah Ali, Mohd Daud Che Yusof, Chye Lee Gan, Mastura Ismail, Wei Yen Kong, Swee Win Lam, Li Yuan Lee, Soo Kun Lim, Chek Loong Loh, Anita Bhajan Manocha, Kee Sing Ng, Nik Nur Fatnoon Nik Ahmad, Vanassa Ratnasingam, Saiful Shahrizal Bin Shudim, Paranthaman Vengadasalam; **Mexico:** Luis David Abaira Munoz, Melchor Alpizar Salazar, Juan Baas Cruz, Mario Burgos Soto, Jose Chevaile Ramos, Alfredo Chew Wong, Jose Ricardo Correa Rotter, Tonatiu Diaz Escalante, Favio Edmundo Enriquez Sosa,

Fernando Flores Lozano, Luis Fernando Flota Cervera, Paul Frenk Baron, Cecilia Garcia Ballesteros, Jose David Gomez Rangel, Luis Enrique Herrera Jimenez, Sergio Saul Irizar Santana, Fernando Jimenez Flores, Hugo Laviada Molina, Rosa Isela Luna Ceballos, Belia Martin del Campo Blanco, Guadalupe Morales Franco, Oscar Tarsicio Moreno Loza, Cynthia Mustieles Rocha, Gregorio Obrador Vera, Ricardo Orozco Castellanos, Juan Peralta Calcaneo, Miguel Angel Reyes Rosano, Hiromi Rodriguez Pattzi, Juan Rosas Guzman, Isabel Erika Rucker Joerg, Sandra Berenice Saavedra Sanchez, Jose Hector Sanchez Mijangos, Pablo Serrano Sanson, Juan Alfredo Tamayo y Orozco, Eloisa Tellez Chavez, Alejandro Valdes Cepeda, Luis Venegas Carrillo, Juan Villagordoa Mesa, Rolando Zamarripa Escobedo; **New Zealand:** John Baker, Paul Noonan, Russell Scott, Robert Walker, Edward Watson, Michael Williams, Simon Young; **Philippines:** Zaynab Abejuela, Jeimeen Agra, Grace Aquitania, Clodoaido Caringal, Rhea Severina Comia, Lalaine Delos Santos, Olivert Gomez, Cecilia Jimeno, Florence Santos, Gerry Tan, Marsha Tolentino, Christy Yao, Yvette Ethel Yap, Ma. Dovie Lallaine Ygpuara; **Poland:** Renata Bijata-Bronisz, Lucyna Hotlos, Andrzej Januszewicz, Barbara Kaczmarek, Anna Kaminska, Lech Lazuka, Andrzej Madej, Stanislaw Mazur, Dorota Mlodawska-Choluj, Michal Nowicki, Grazyna Orłowska-Kowalik, Grazyna Popenda, Barbara Rewerska, Dariusz Sowinski; **Romania:** Liliana Monica Angelescu, Veronica Anghel, Rodica-Ioana Avram, Mihaela-Magdalena Busegeanu, Adriana Cif, Dana Cosma, Carmen Crisan, Luiza Despina Demian, Ioana Emilia Ferariu, Ildiko Halmagyi, Nicolae Hancu, Mircea Munteanu, Doru Negru, Adriana Gabriela Onaca, Ligia Petrica, Amarin Remus Popa, Aurelian-Emil Ranetti, Cristian Serafinceanu, Cristina Toarba; **Russia:** Alina Agafyina, Olga Barbarash, Olga Barysheva, Daniil Chizhov, Vladimir Dobronravov, Alexander Dreval, Irina Glinkina, Elena Grineva, Vladimir Khirmanov, Elena Kolmakova, Tatiana Koroleva, Liudmila Kvitkova, Viacheslav Marasaev, Ashot Mkrtyumyan, Tatiana Morugova, Galina Nagibovich, Oleg Nagibovich, Sergei Nedogoda, Irina Osipova, Tatiana Raskina, Yulia Samoylova, Olga Sazonova, Minara Shamkhalova, Elena Shutemova, Yuriy Shwartz, Oleg Uriasyev, Sergey Vorobyev, Anna Zateyshchikova, Dmitry Zateyshshikov, Tatyana Zykova; **Serbia:** Slobodan Antic, Miodrag Djordjevic, Aleksandra Kendereski, Katarina Lalic, Nebojsa Lalic,

Vesna Popovic-Radinovic; **Slovakia:** Jana Babikova, Olga Benusova, Ingrid Baganova, Jan Culak, Andrej Dzupina, Jana Dzuponova, Peter Fulop, Adriana Ilavska, Emil Martinka, Zuzana Ochodnicka, Daniel Pella, Iveta Smatanova; **South Africa:** Fayzal Ahmed, Aysha Badat, Johannes Breedt, Lawrence Distiller, Vimladhevi Govender, Ravendran Govender, Mukesh Joshi, Jaco Jurgens, Gulam Latiff, Landman Lombard, Mohamed Mookadam, Nomangesi Ngcakani, Hendrik Nortje, Helena Oosthuizen, Larisha Pillay-Ramaya, Hans Prozesky, Jeevren Reddy, Paul Rheeder, Mary Seeber; **South Korea:** Dong-Wan Chae, Young Min Cho, In-Kyung Jeong, Sin Gon Kim, Yeong Hoon Kim, Hyuk-Sang Kwon, Min Jeong Kwon, Byung-Wan Lee, JungEun Lee, Moon-Kyu Lee, Moon-Suk Nam, Kook-Hwan Oh, Cheol-Young Park, Sun-Hee Park, Kun Ho Yoon; **Spain:** Pere Alvarez Garcia, Luis Asmarats Mercadal, Clara Barrios, Fernando Cereto Castro, Secundino Cigarran Guldris, Marta Dominguez Lopez, Jesus Egido de los Rios, Gema Fernandez Fresnedo, Antonio Galan Serrano, Isabel Garcia, Francisco Javier Gonzalez Martinez, Jose Esteban Jodar Gimeno, Manuel Lopez Mendoza, Tamara Malek Marin, Cristobal Morales Portillo, Maria Antonia Munar Vila, Manuel Muñoz Torres, Javier Nieto Iglesias, Jonay Pantoja Perez, Merce Perez Vera, Jose M<sup>a</sup> Portoles Perez, María Angustias Quesada Simón, Rafael Simo Canonge, Alfonso Soto Gonzalez, Manel Terns Riera, Francisco Jose Tinahones Madueno, Mercedes Velo Plaza; **Taiwan:** Chwen-Tzuei Chang, Lee-Ming Chuang, Te-Lin Hsia, Chang-Hsun Hsieh, Shang-Jyh Hwang, Chih-Ching Lin, Yung-Chuan Lu, Wayne H-H Sheu; **Ukraine:** Olga Barna, Svitlana D. Bilyk, Volodymyr Botsyurko, Iryna Dudar, Ivan Fushtey, Olga Godlevska, Oleksandr Golovchenko, Olga Gyrina, Anatoliy Kazmirchuk, Mykola Kolesnyk, Iuliia Komisarenko, Oleksii Korzh, Nonna Kravchun, Oleg Legun, Borys Mankovskyy, Liliya Martynyuk, Yuriy Mostovoy, Nataliia Pashkovska, Larysa Pererva, Tetyana Pertseva, Oleksandr Samoylov, Ivan Smirnov, Yevgeniya Svyschenko, Galyna Tomashkevych, Ivan Topchii, Nadiya Tryshchuk, Vira Tseluyko, Vadym Vizir, Maryna Vlasenko, Tetiana Zlova, Liliia Zub; **United Arab Emirates:** Salah Abusnana, Mohamed Railey; **United Kingdom:** Kamal Abouglila, Paul Ainsworth, Zishan Ali, Vijayaraman Arutchelvam, Maria Barnard, Srikanth Bellary, Emyr Davies, Mark Davies, Simon Davies, Alison Dawson, Mohsen El Kossi, Patrick English, Donald

Fraser, Luigi Gnudi, Anthony Gunstone, Timothy Hall, Wasim Hanif, Alan Jackson, Andrew Johnson, Franklin Joseph, Singhan Krishnan, Mick Kumwenda, Iain MacDougall, Paul Nixon, Joseph O'Hare, Sam Philip, Shenaz Ramtoola, Manish Saxena, Davesh Sennik, Godwin Simon, Baldev Singh, Jeffrey Stephens, Anna Strzelecka, Rehan Symonds, Wayne Turner, Mona Wahba, John Wakeling, David Wheeler, Peter Winocour; **United States:** Joseph Abdallah, Raied Abdullah, Matthew Abramowitz, Idalia Acosta, Joseph Aiello, Laura Akright, Ayim Akyea-Djamson, Rajendran Alappan, Radica Alicic, Amer Al-Karadsheh, Dale Crawford Allison, Carlos Arauz-Pacheco, Shahabul Arfeen, Ahmed Arif, Moogali Arvind, Naveen Atray, Ahmed Awad, George Bakris, Peggy Barnhill, Elizabeth Barranco, Carlos Barrera, Matthew Beacom, Venkata Behara, Diogo Belo, Rhonda Bentley-Lewis, Ramon Berenguer, Lidia Bermudez, Marializa Bernardo, Mihaela Biscoveanu, Cynthia Bowman-Stroud, Donald Brandon, Osvaldo Brusco, Robert Busch, Yamil Canaan, Alicia Chilito, Tom Christensen, Cynthia Christiano, Elena Christofides, Caroucel Chuateco, Kenneth Cohen, Robert Cohen, Debbie Cohen-Stein, Charles Cook, Daniel Coyne, Nizar Daboul, Riad Darwish, Adarsh Daswani, Kenneth Deck, Cyrus Desouza, Devasmita Dev, Monika Dhillon, Sohan Dua, Frank Eder, Ana Maria Elosegui, Mohamed El-Shahawy, John Ervin, Alberto Esquenazi, John Evans, Steven Fishbane, Juan Frias, Eugenia Galindo-Ramos, Claude Galphin, Adline Ghazi, Enrique Gonzalez, David Gorson, Anupama Gowda, Barbara Greco, Stephen Grubb, Rakesh Gulati, Jamal Hammoud, Stuart Handelsman, Israel Hartman, Kenneth Hershon, Daniel Hiser, George Hon, Radu Jacob, Maria Jaime, Aamir Jamal, Charles Kaupke, Gerald Keightley, Elizabeth Kern, Rakhi Khanna, Zeid Khitan, Sun Kim, Nelson Kopyt, Csaba Kovesdy, Gopal Krishna, Jeffrey (Jay) Kropp, Amrendra Kumar, Jayant Kumar, Neil Kumar, Jorge Kusnir, Wendy Lane, Mary Lawrence, Lawrence Lehrner, John Lentz, Dennis Levinson, Derek Lewis, Kenneth Liss, Andreas Maddux, Hiralal Maheshwari, Sreedhar Mandayam, Isam Marar, Bhasker Mehta, John Middleton, Jorge Mordujovich, Ramon Moreda, Moustafa Moustafa, Samuel Mujica Trenche, Mohanram Narayanan, Javier Narvarte, Tareq Nassar, George Newman, Brian Nichol, Philip Nicol, Josier Nisnisan, A. Kaldun Nossuli, Chamberlain Obialo, Sarah Oleelewe, Michael Oliver, Andrew O'Shaughnessy,

John Padron, Rohit Pankhaniya, Reginald Parker, Devesh Patel, Gnyandev Patel, Nina Patel, Humberto Pavon, Armando Perez, Carlos Perez, Alan Perlman, Karlton Pettis, Walter Pharr, Andrea Phillips, Raman Purighalla, Luis Quesada-Suarez, Rajiv Ranjan, Sanjeev Rastogi, Jakkidi Reddy, Marc Rendell, Lisa Rich, Michael Robinson, Hector Rodriguez, Sylvia Rosas, Fadi Saba, Rallabhandi Sankaram, Ravi Sarin, Robert Schreiman, David Scott, Mohamed Sekkarie, John Sensenbrenner, Muhammad Shakeel, Michael Shanik, Sylvia Shaw, Stephen Smith, Richard Solomon, Amy Sprague, Leslie Spry, Pusadee Suchinda, Senan Sultan, Prasanth Surampudi, Sherry Sussman, Anjanette Tan, Antonio Terrelonge, Michael Thompson, Fernando Trespalacios, Bruce Trippe, Pilar Trueba, Marcel Twahirwa, John Updegrove, Peter Van Buren, Mark Vannorsdall, Freemu Varghese, Pedro Velasquez-Mieyer, Sailaja Ventrapragada, Goga Vukotic, Khurram Wadud, Mark Warren, Henry Watson, Ronald Watts, Daniel Weiner, James Welker, Jean Welsh, Shelley Williams, Michelle Zaniewski-Singh.
